# Supplementary material for: Incoming data quality control in high-resolution urban climate simulations: a Hong Kong–Shenzhen area urban climate simulation as a case study using the WRF/Noah LSM/SLUCM model (Version 3.7.1)
Source: Copernicus journal article supplement (doi:10.5194/gmd-13-6349-2020), 2020-12-14
Supplement: Supplementary file 1 [file gmd-13-6349-2020-supplement.pdf]

Supplement of Geosci. Model Dev., 13, 6349–6360, 2020  
<https://doi.org/10.5194/gmd-13-6349-2020-supplement>  
© Author(s) 2020. This work is distributed under  
the Creative Commons Attribution 4.0 License.

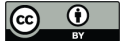

*Supplement of*

**Incoming data quality control in high-resolution urban climate simulations: a Hong Kong–Shenzhen area urban climate simulation as a case study using the WRF/Noah LSM/SLUCM model (Version 3.7.1)**

**Zhiqiang Li et al.**

*Correspondence to:* Zhiqiang Li (paterlee@hku.hk)

The copyright of individual parts of the supplement might differ from the CC BY 4.0 License.

# Supplementary Material

## S1 Comparisons in the urban morphology indicators

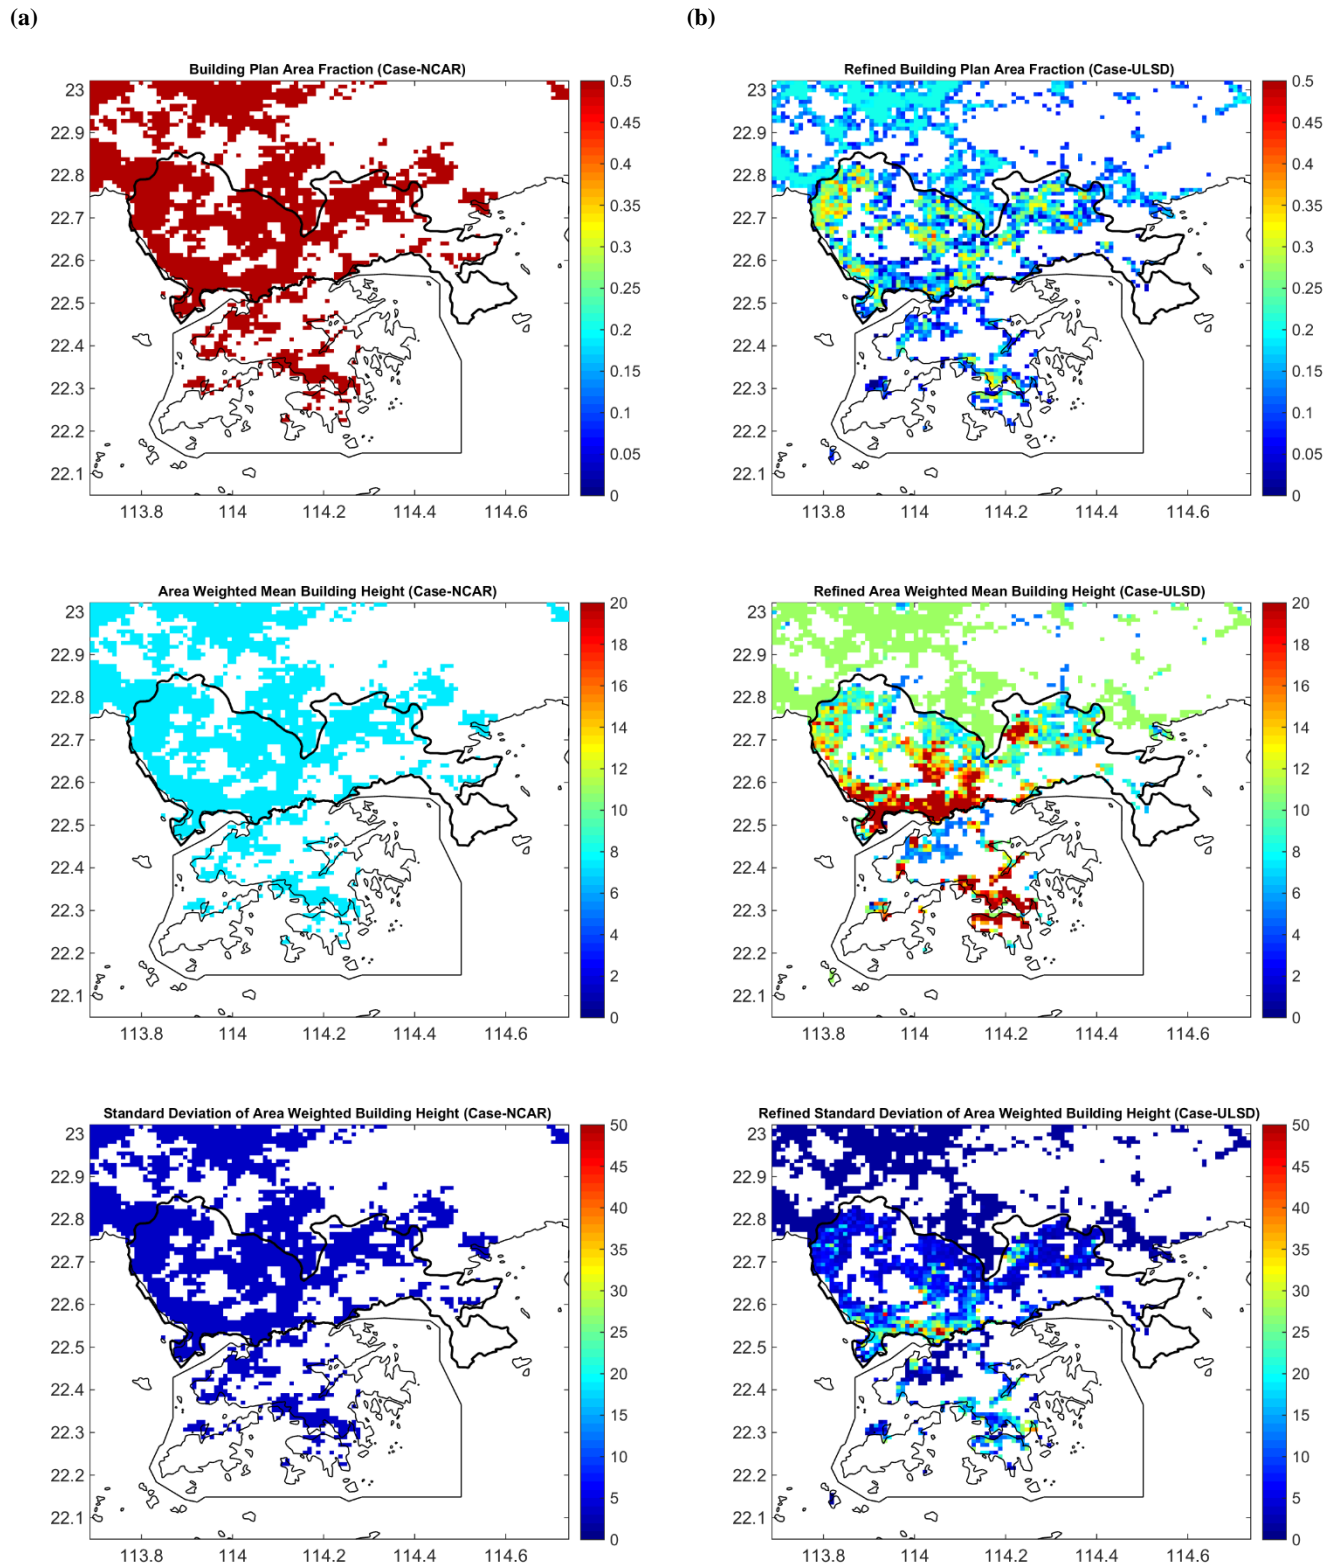

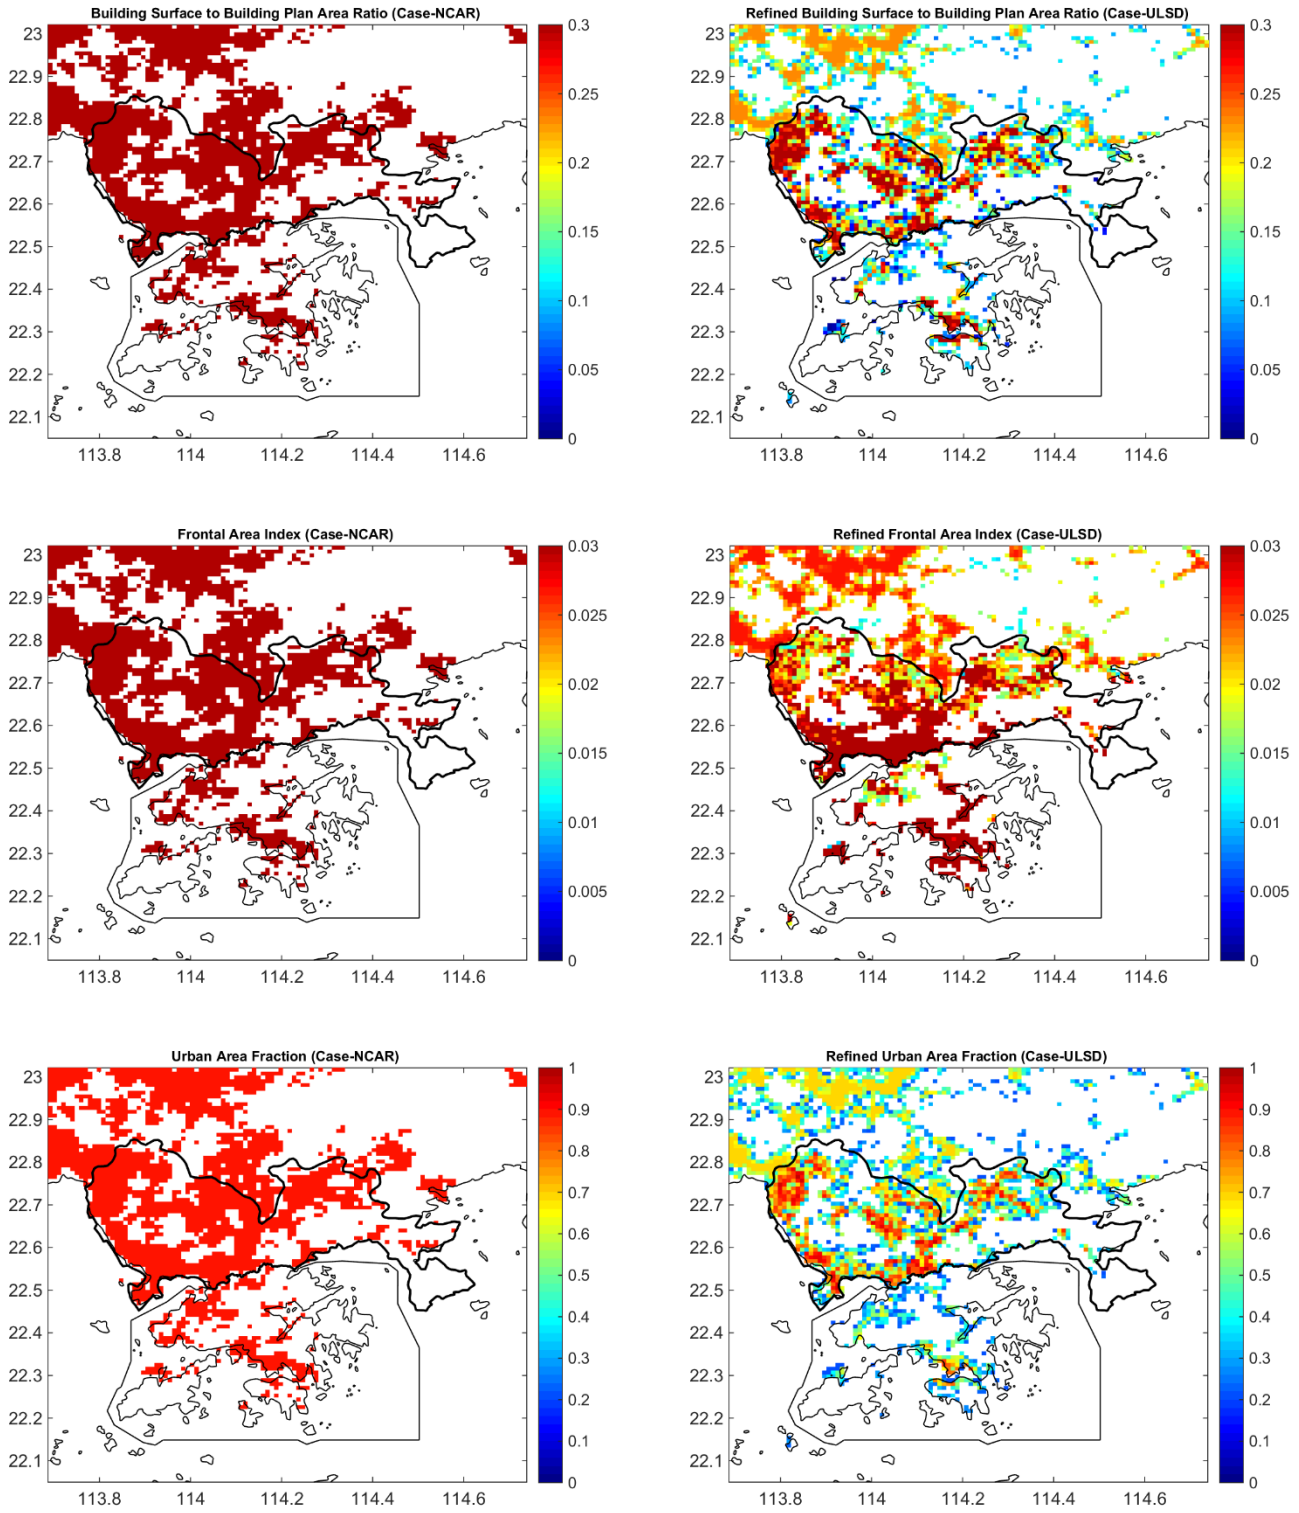

Figure S1: Case-NCAR (a) and Case-ULSD (b, data source: Li et al., 2019 a and b) building plan area fraction, area weighted mean building height, standard deviation of area weighted mean building height, building surface to building plan area ratio, frontal area index, and urban area fraction.

S2 Comparisons in the PSS monthly variations of surface temperature, relative humidity, precipitation, and wind speed

(a)

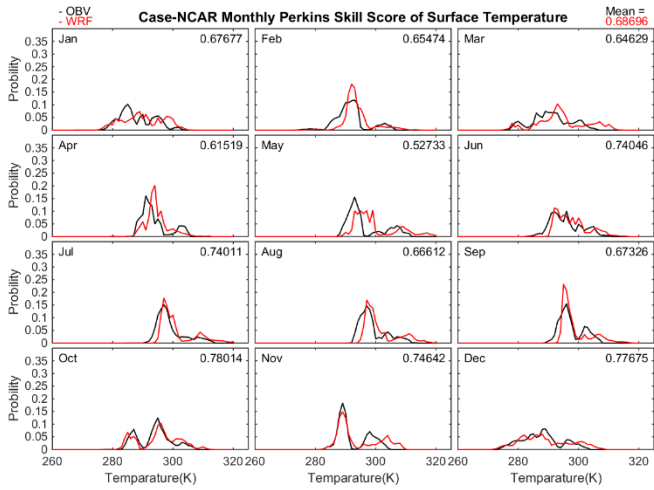

(b)

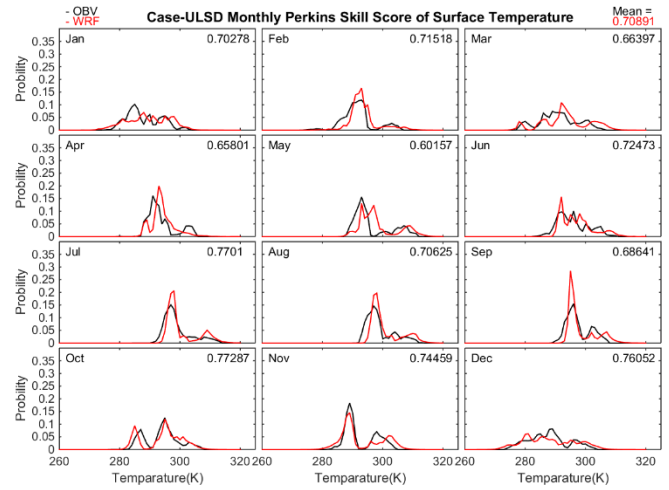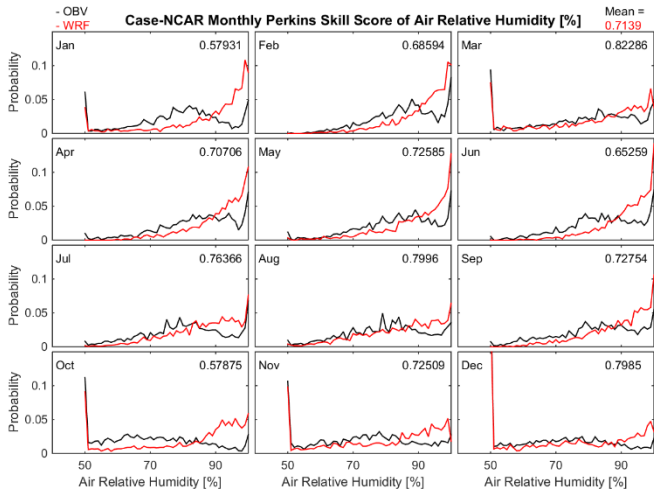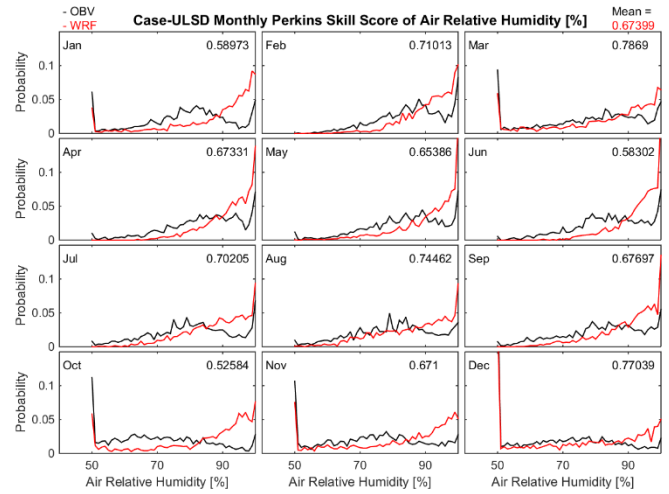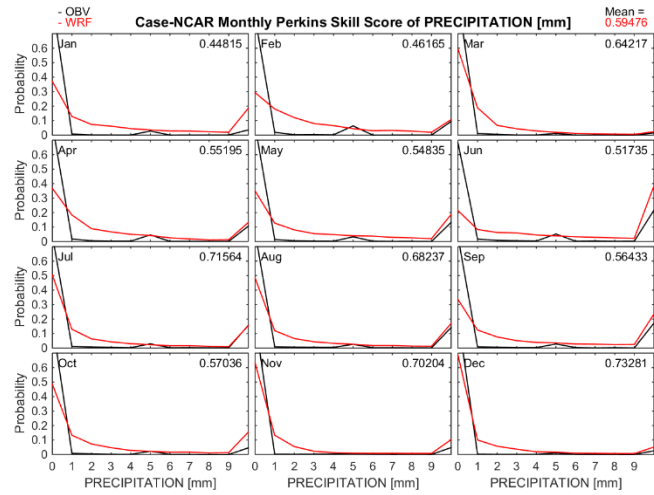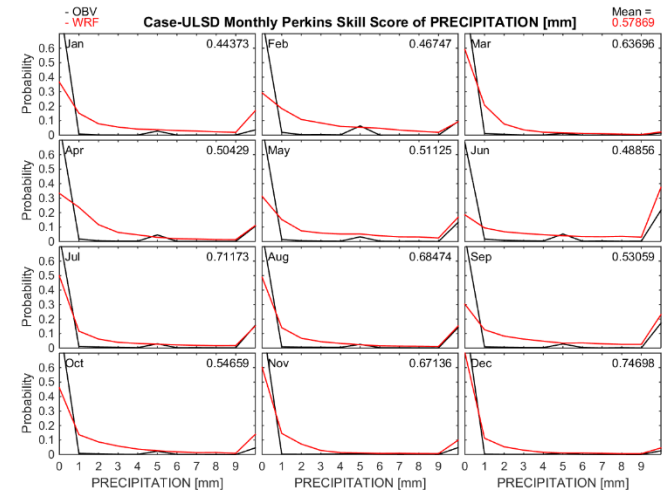

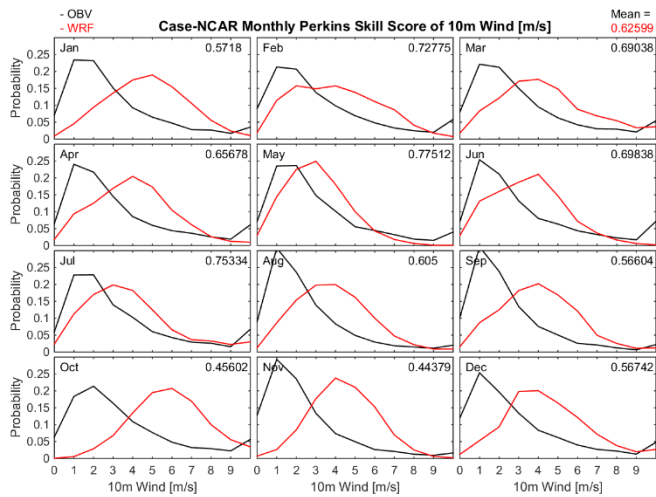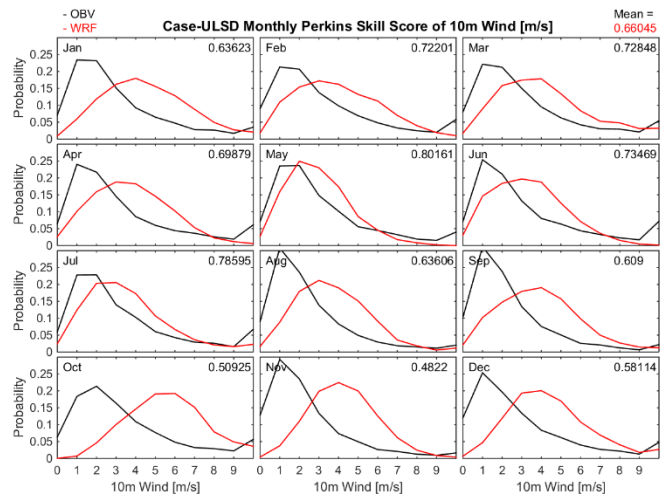

Figure S2: PSS of surface temperature, relative humidity, precipitation, and 10-meters wind of Case-NCAR (a) and Case-ULSD (b, data source: Li et al., 2019 a and b).

S3 Comparisons in the PDFD monthly variations of surface temperature, and relative humidity, precipitation, and wind

5 speed

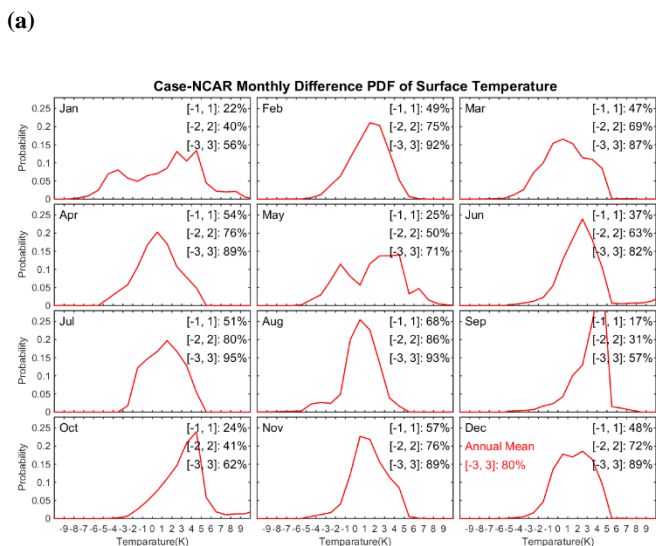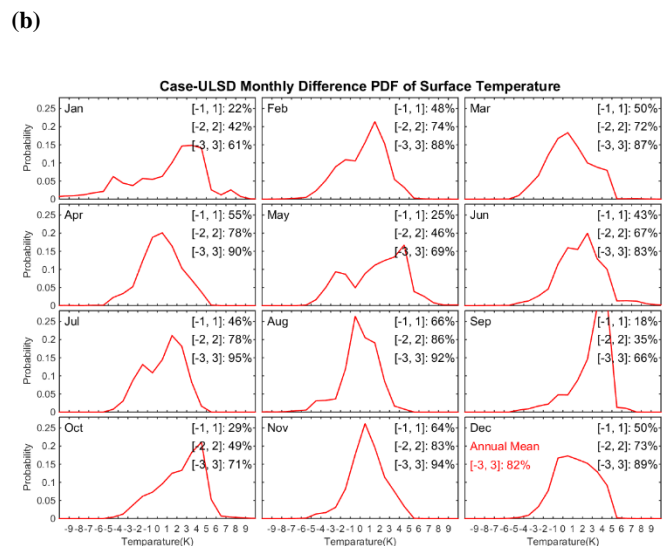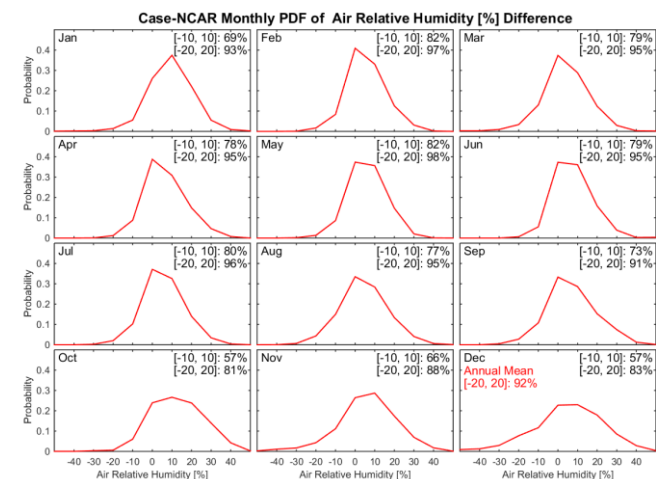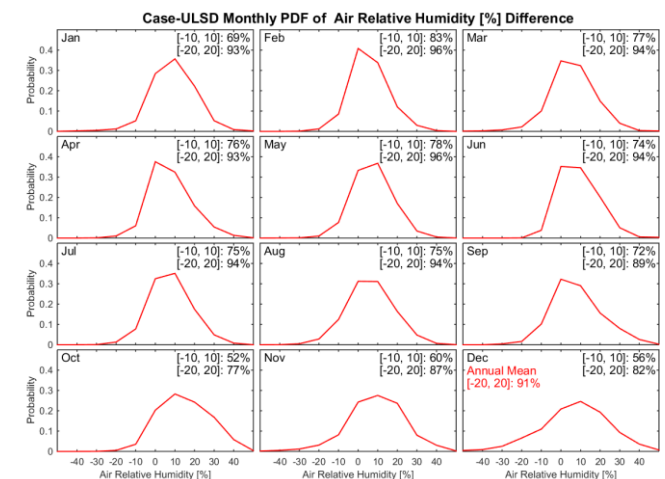

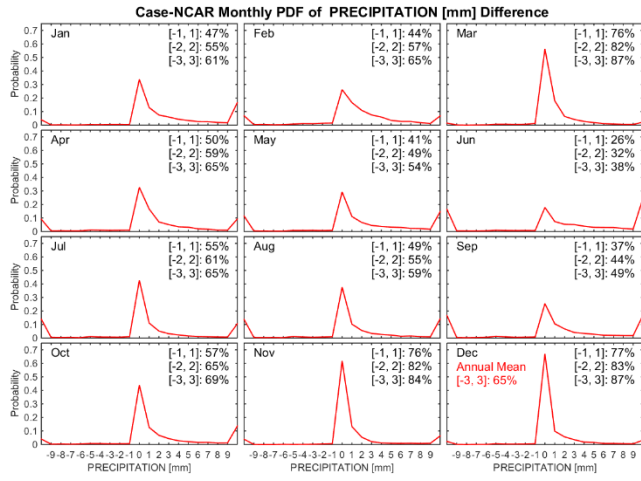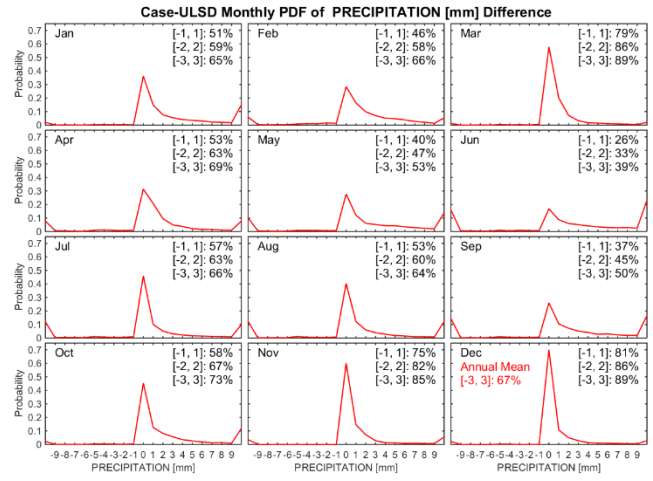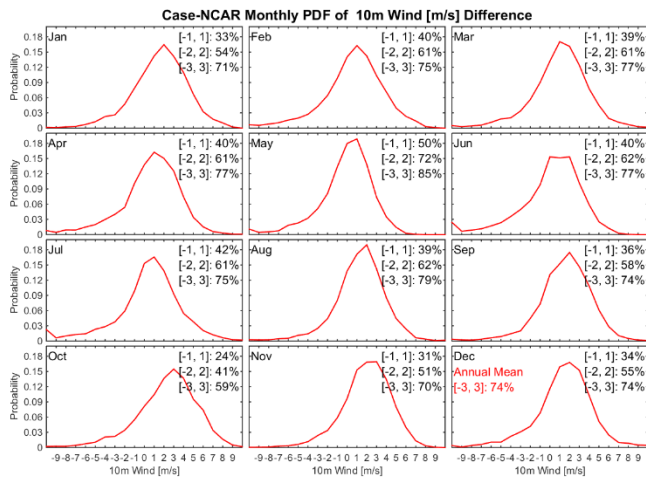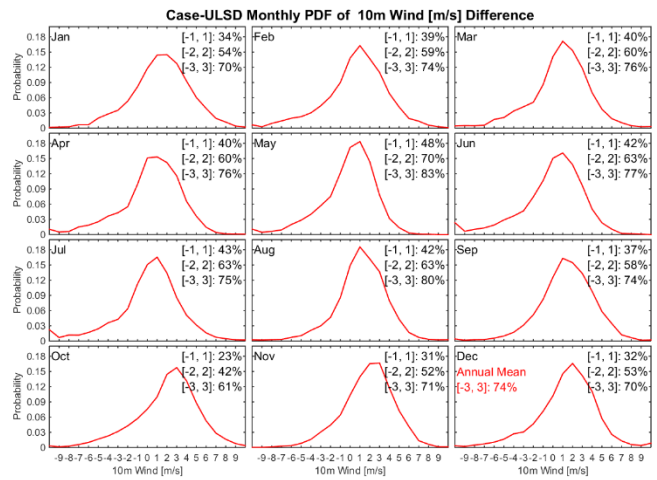

Figure S3: PDF of the difference of surface temperature, relative humidity, precipitation, and 10-meters wind of Case-NCAR (a) and Case-ULSD (b, data source: Li et al., 2019 a and b).

5 S4 Comparisons in the spatial distribution of surface temperature, relative humidity, precipitation, and wind speed

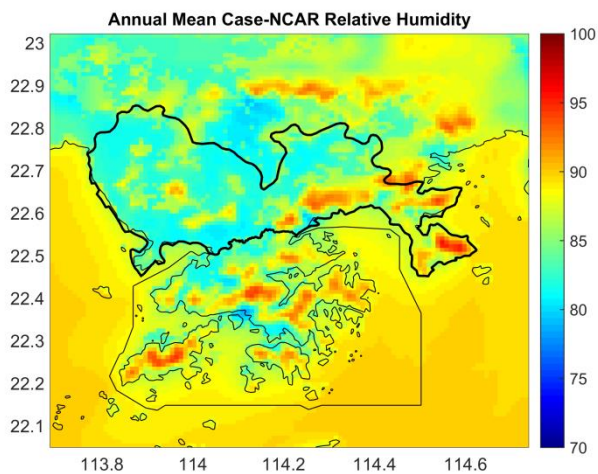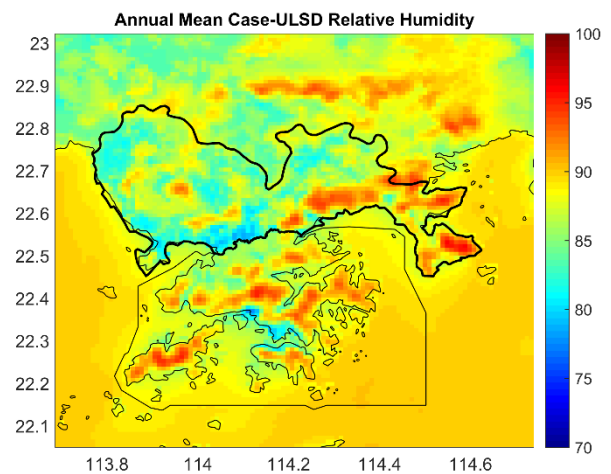

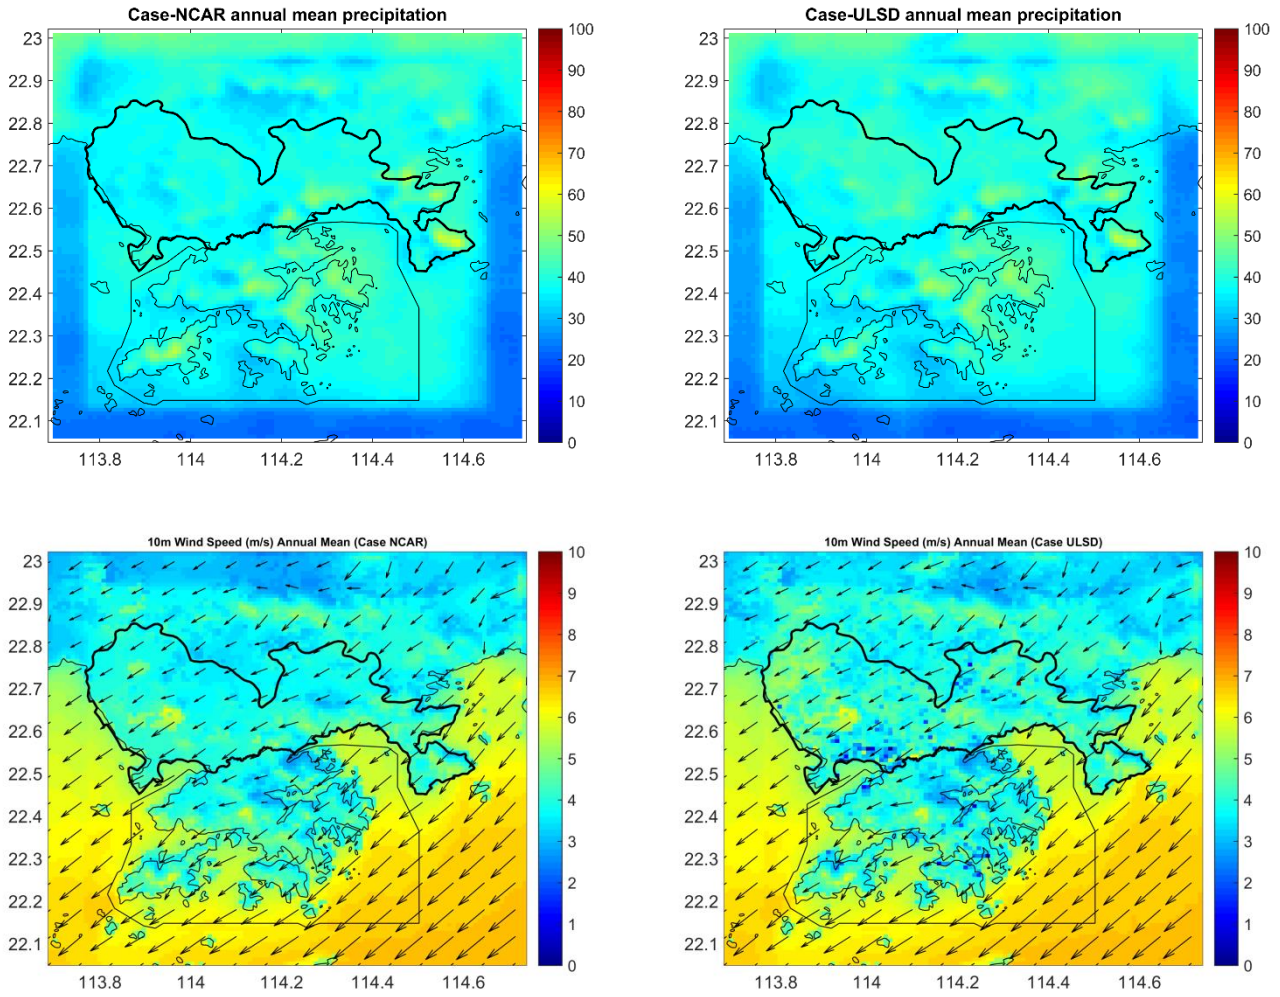

Figure S4: Spatial distribution of relative humidity, precipitation, and 10-meters wind of Case-NCAR (a) and Case-ULSD (b).

**S5 Comparisons in the TCSV of surface temperature, and relative humidity, precipitation, and wind speed**

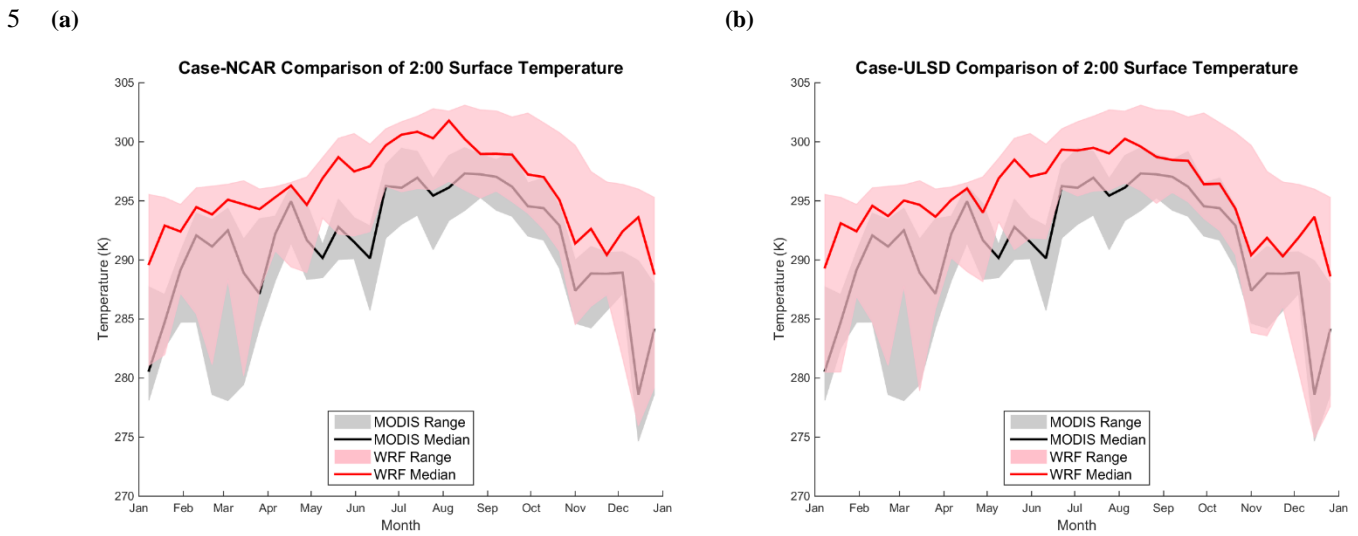

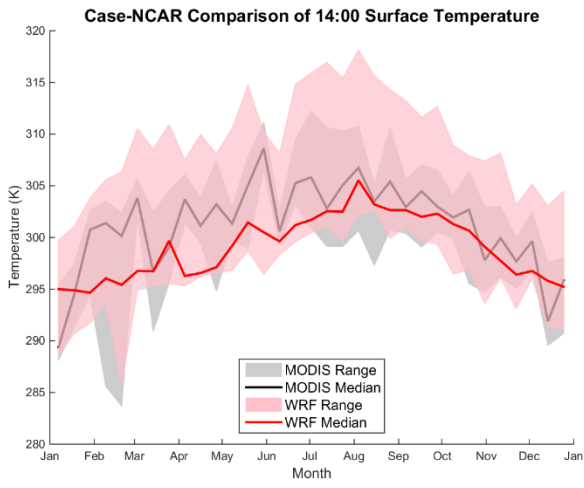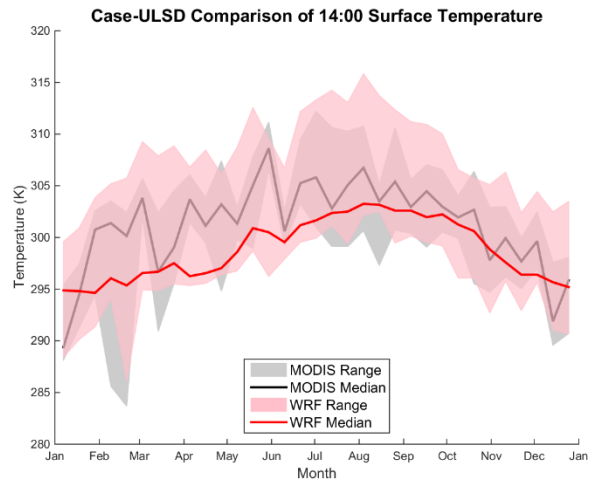

Figure S5: TCSV of the surface temperature of Case-NCAR (a) and Case-ULSD (b, data source: Li et al., 2019 b) at 2:00 and 14:00.

(a)

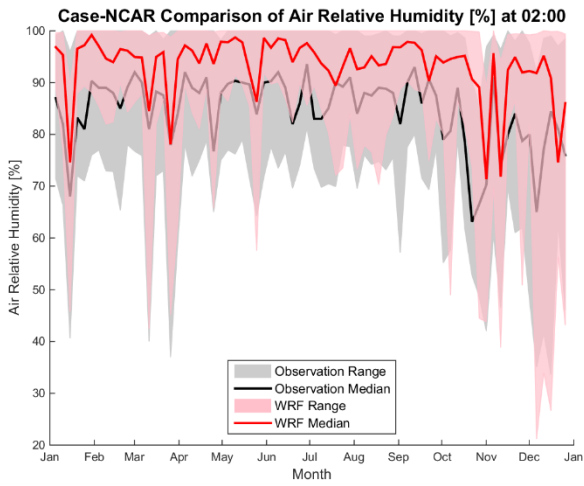

(b)

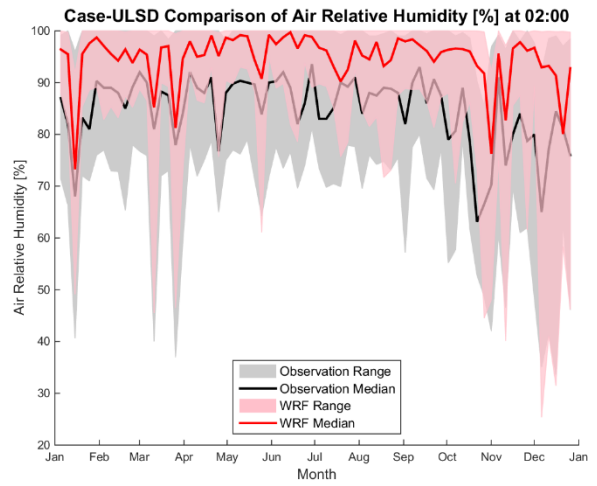

5

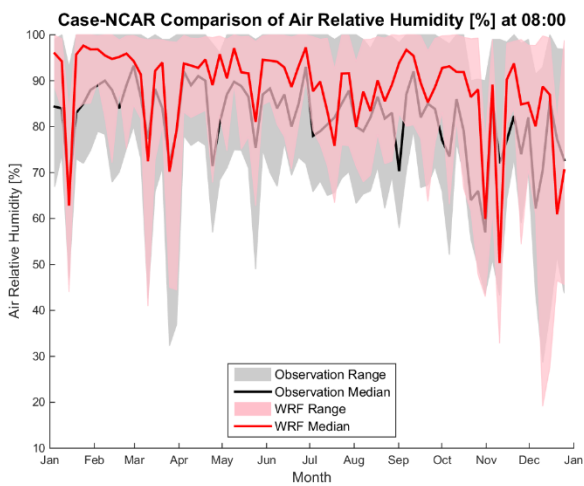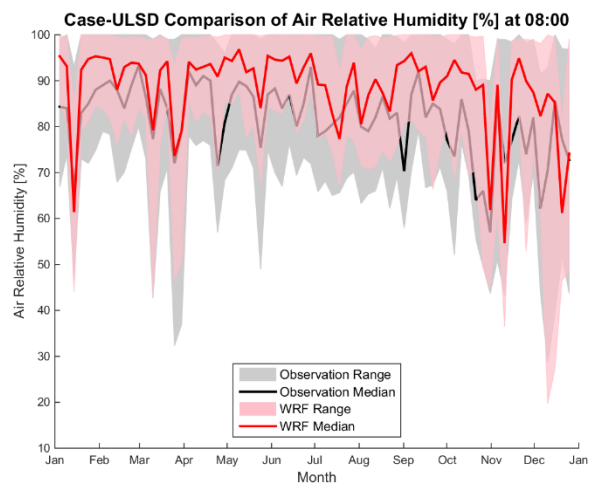



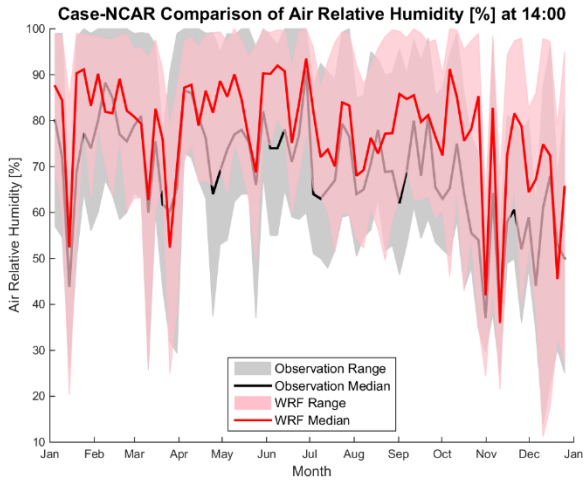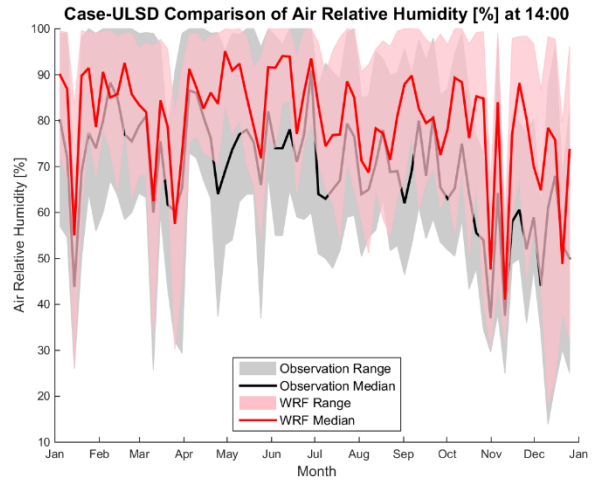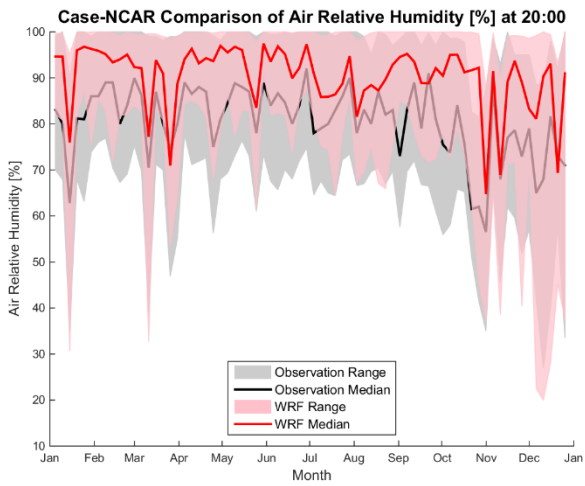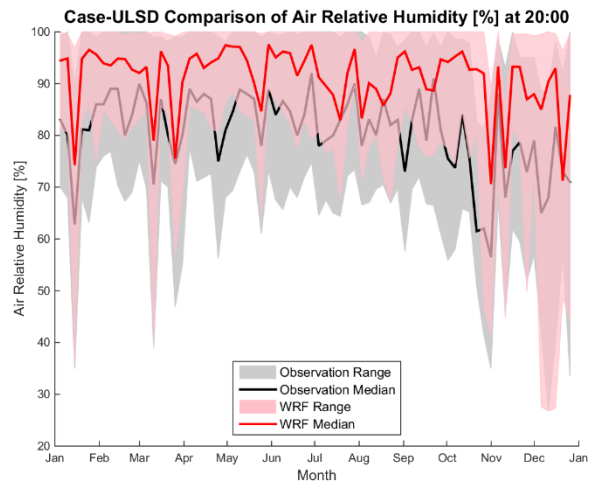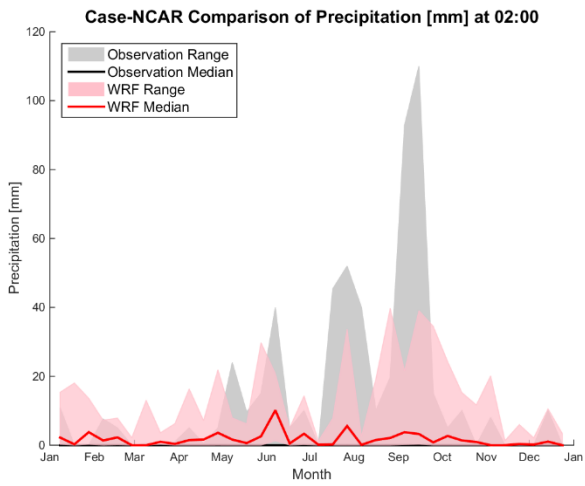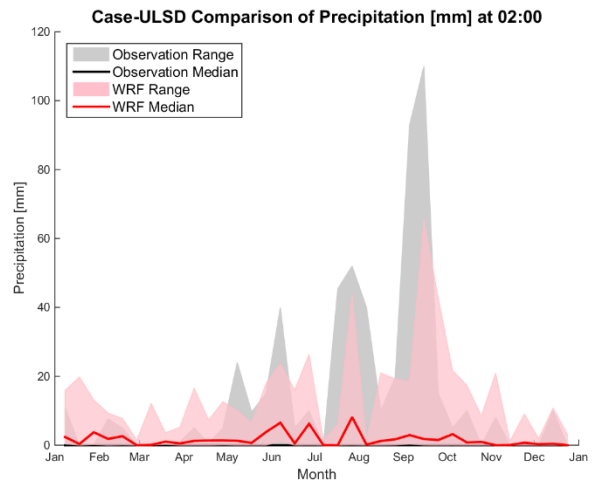

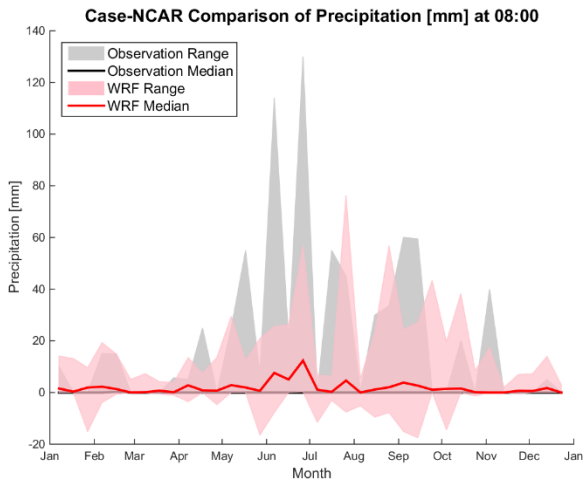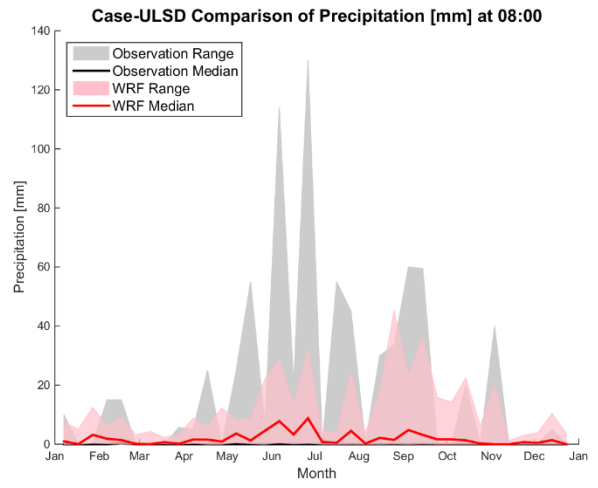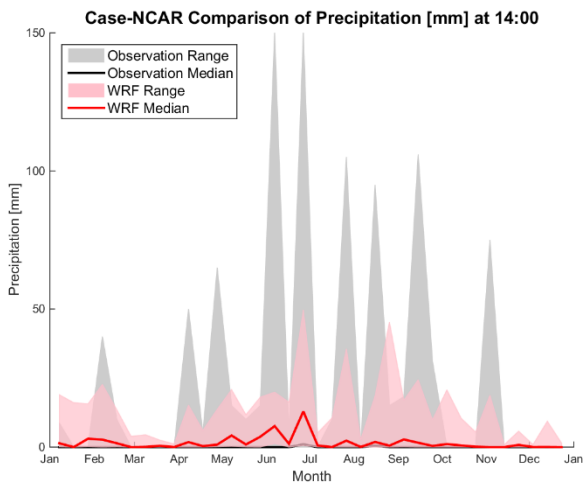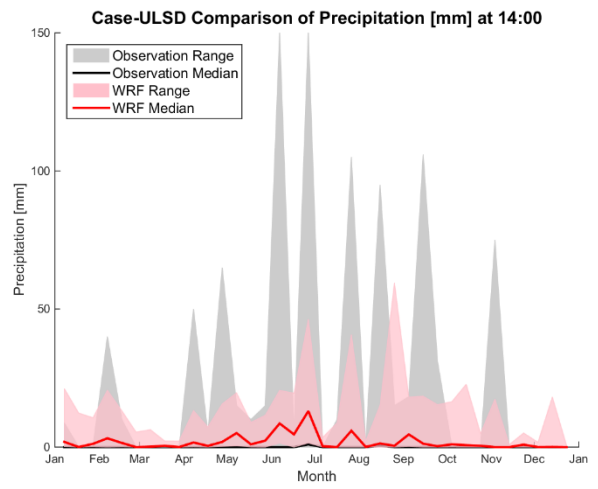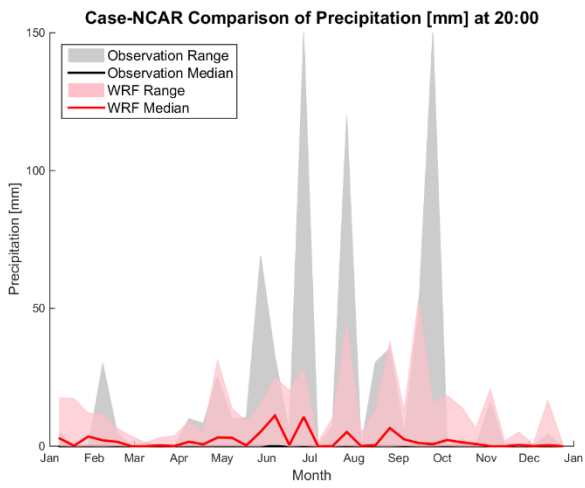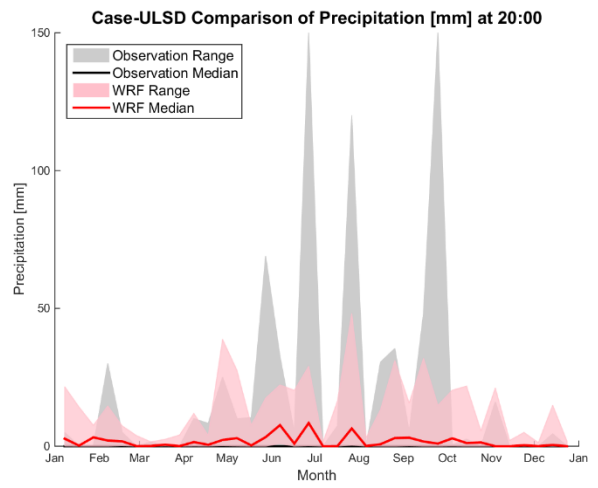

Case-NCAR Comparison of 10m Wind [m/s] at 02:00

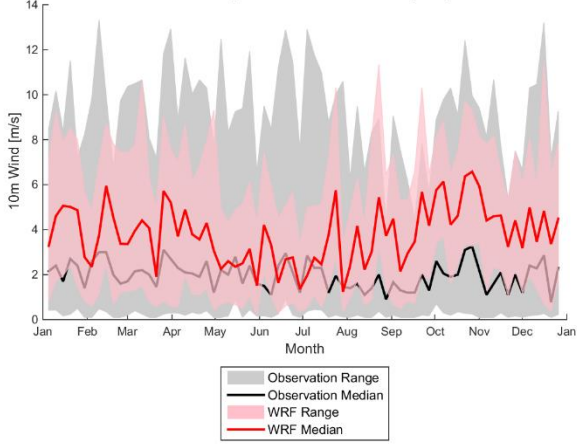

Case-ULSD Comparison of 10m Wind [m/s] at 02:00

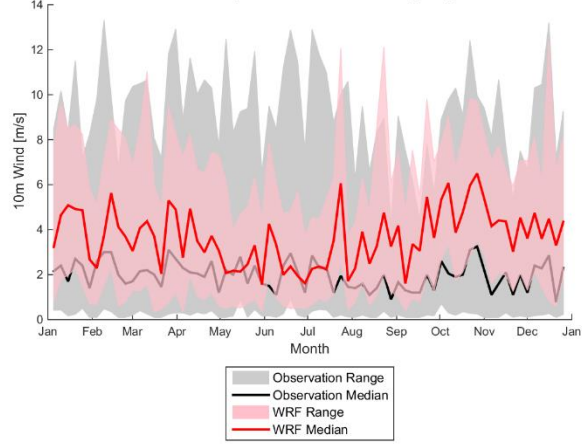

Case-NCAR Comparison of 10m Wind [m/s] at 08:00

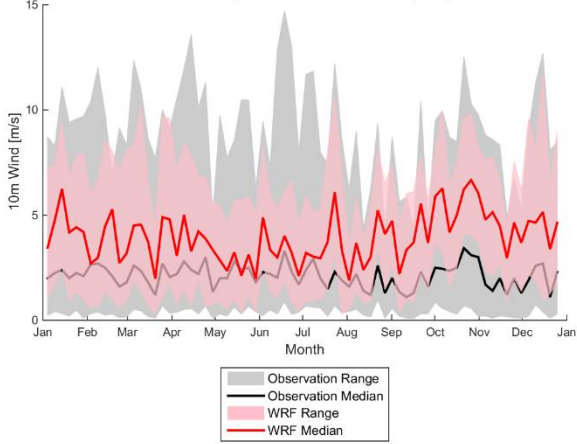

Case-ULSD Comparison of 10m Wind [m/s] at 08:00

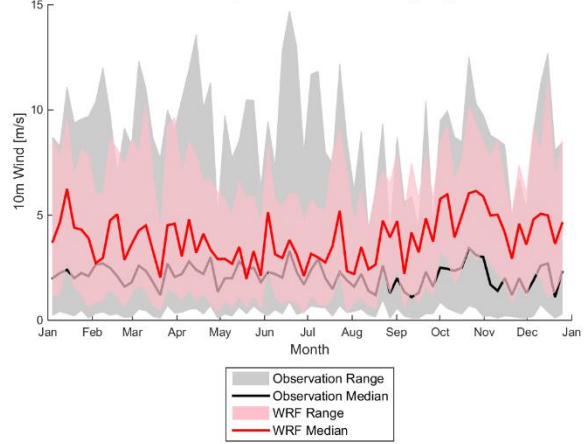

Case-NCAR Comparison of 10m Wind [m/s] at 14:00

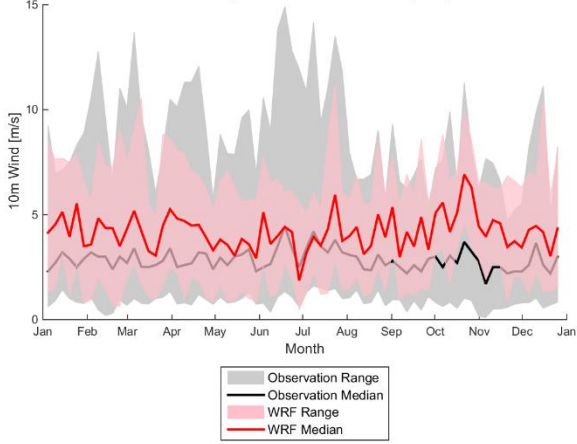

Case-ULSD Comparison of 10m Wind [m/s] at 14:00

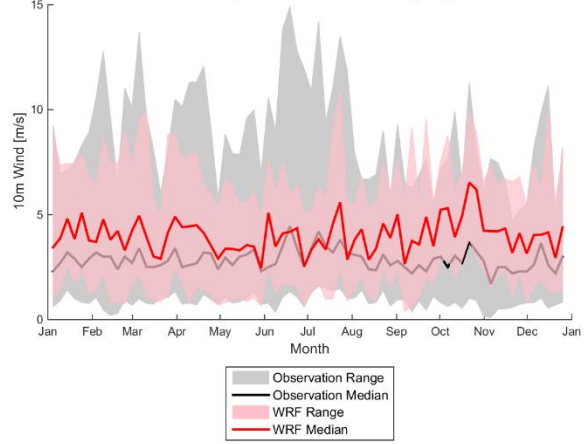

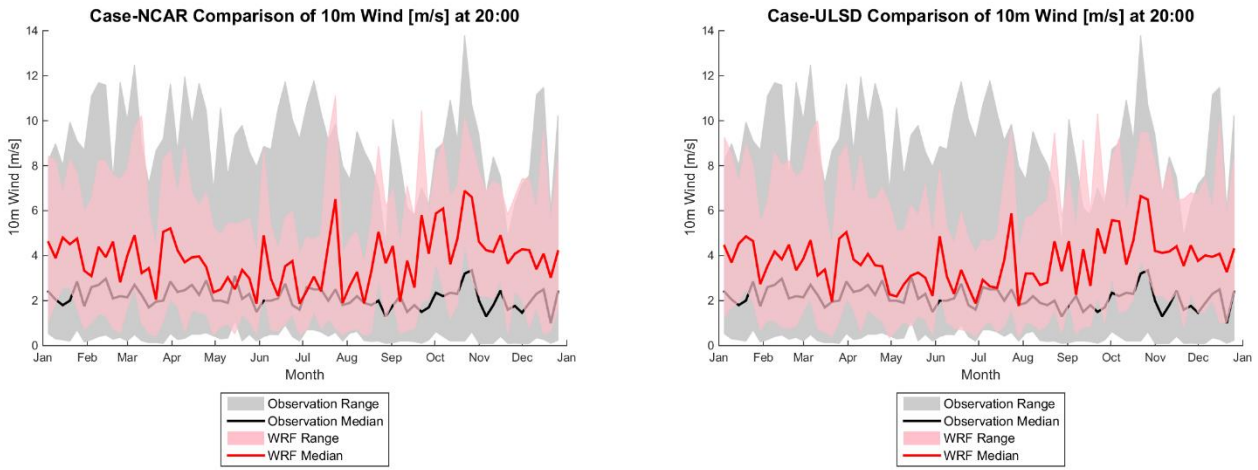

**Figure S6:** TCSV of relative humidity, precipitation, and 10-meters wind of Case-NCAR (a) and Case-ULSD (b, data source: Li et al., 2019 b) at 2:00, 8:00, 14:00, and 20:00.

### S6 Model setting

- The model settings of both comparative urban climate simulation cases are the same as that of the companion study (Li et al., 2019 b). We set four telescoping nested domains with a center at 22°39'30" N, 114°11'30" as the horizontal domain configuration, and a set of eta level with 51 members for each horizontal domain as the vertical grid spacing configuration. Moreover, we configured the physics components with the schemes in Table S1.

**Table S1:** The configuration of the physics components (Li et al., 2019 b).

| Component                | Scheme                          |
|--------------------------|---------------------------------|
| Cumulus                  | New Simplified Arakawa-Schubert |
| Microphysics             | WDM5                            |
| Radiation                | RRTMG                           |
| Planetary Boundary Layer | Bougeault–Lacarrere             |
| Surface Layer            | Revised MM5                     |
| Land Surface Model       | Noah LSM                        |
| Urban Canopy Model       | Single-layer                    |
